# Supplementary material
Source: PubMed Central journal article supplement (PMC4807493)
Supplement: IAI.01497-15_zii999091655so1.pdf [file IAI.01497-15_zii999091655so1.pdf]

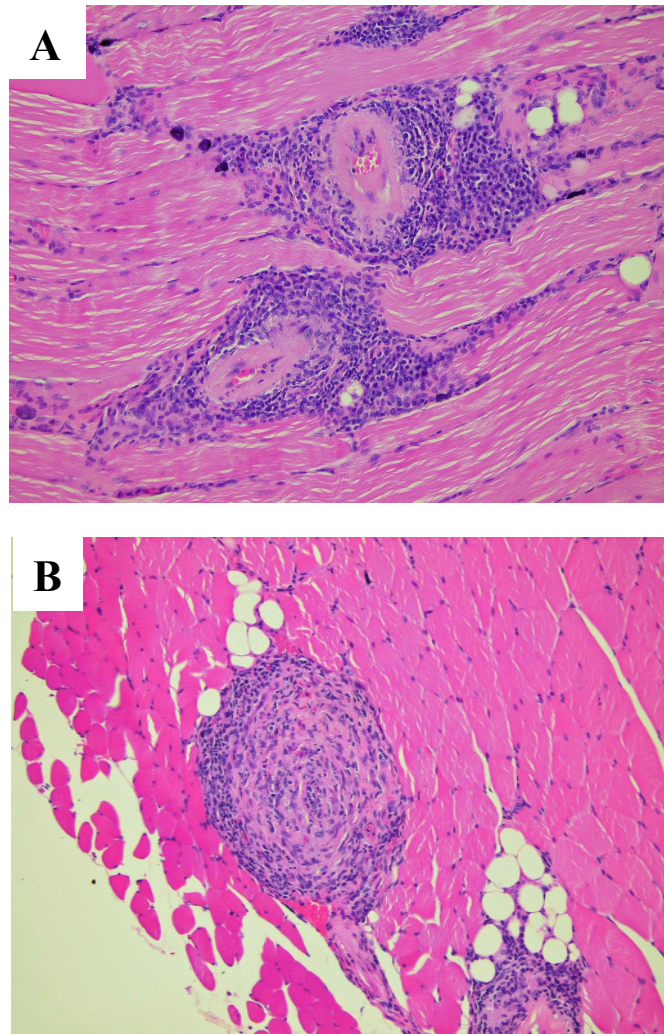

**Supplementary Figure 1. Systemic necrotizing vasculitis develops in C57BL/6J females and in cranial skeletal muscle in chronically *T. cruzi*-infected mice. A, Females. Sections of skeletal muscle from the posterior limbs of 15 month-infected female mice were stained by H&E. Images are representative of 5 infected mice analyzed. Magnification: 200X. B, Cranial muscle. H&E staining of mice 15 months p.i. Images are representative of a group of 9 infected mice (7-15 months after infection) analyzed. Magnification: 200X.**

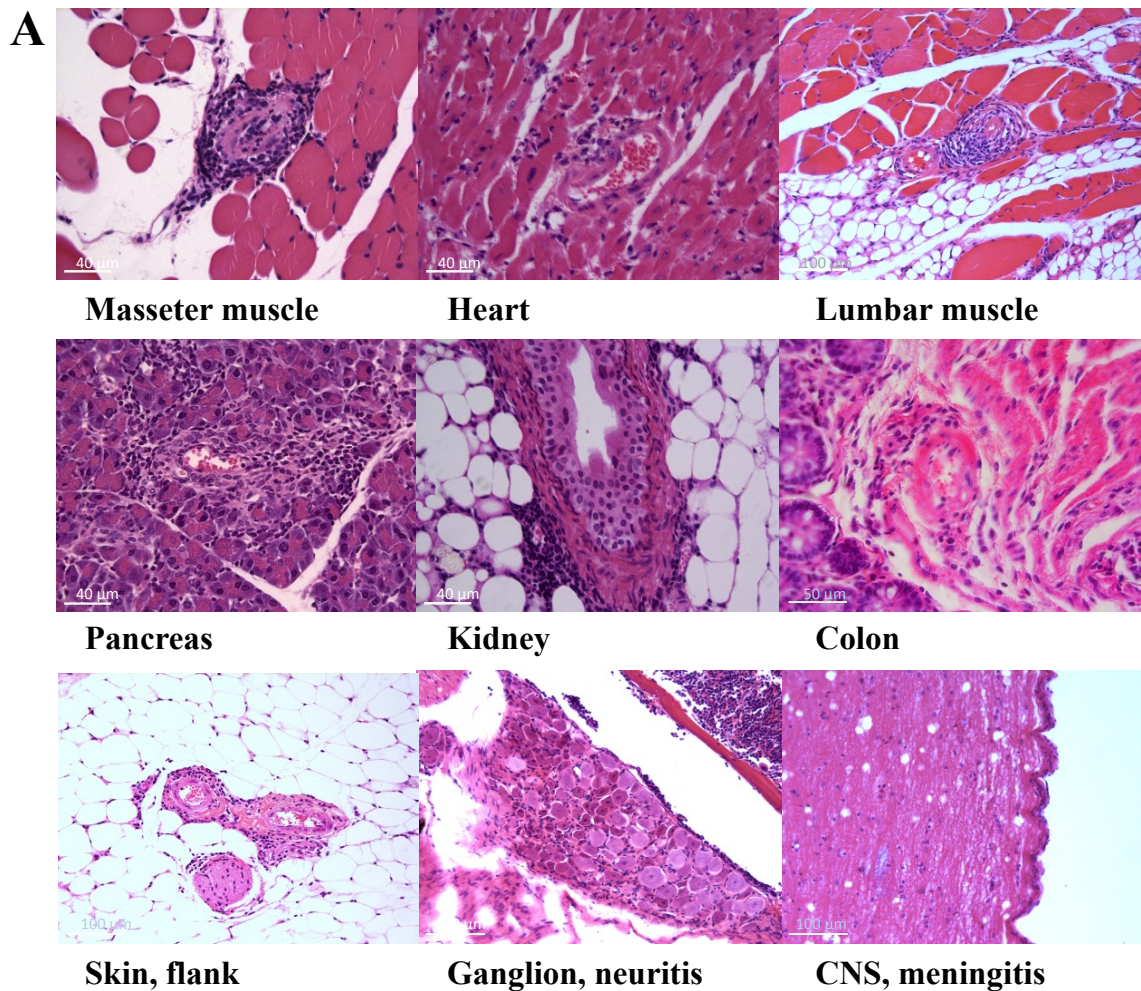

**B**

| Tissue or Organ | Severity Score (n) |   |   |   | Total number of mice analyzed |
|-----------------|--------------------|---|---|---|-------------------------------|
|                 | 0                  | 1 | 2 | 3 |                               |
| Mesentery       | 2                  | 3 | - | - | 5                             |
| Tongue          | -                  | 2 | - | - | 2                             |
| Stomach         | 2                  | 2 | 1 | - | 5                             |
| Esophagus       | 5                  | - | 1 | - | 6                             |
| Trachea         | 1                  | 2 | 1 | - | 4                             |
| Brain           | 14                 | - | - | - | 14                            |
| Liver           | 25                 | - | - | - | 25                            |
| Lung            | 13                 | - | - | - | 13                            |
| Spleen          | 18                 | - | - | - | 18                            |
| Head Sk Muscle  | -                  | - | 5 | 4 | 9                             |

**Supplementary Figure 2. Vasculitis occurs in many but not all organs from chronically *T. cruzi*-infected mice.** A, Images of vascular lesions in various organs. Mice were euthanized after developing muscle atrophy and/or partial or total paralysis of the posterior limbs (7-12 months p.i.). Images are of representative H&E-stained sections of the indicated mouse organs and tissues, and are representative of a total of 12 infected mice analyzed. B, Analysis of organs for vasculitis. Magnification is indicated at the lower right of each panel.



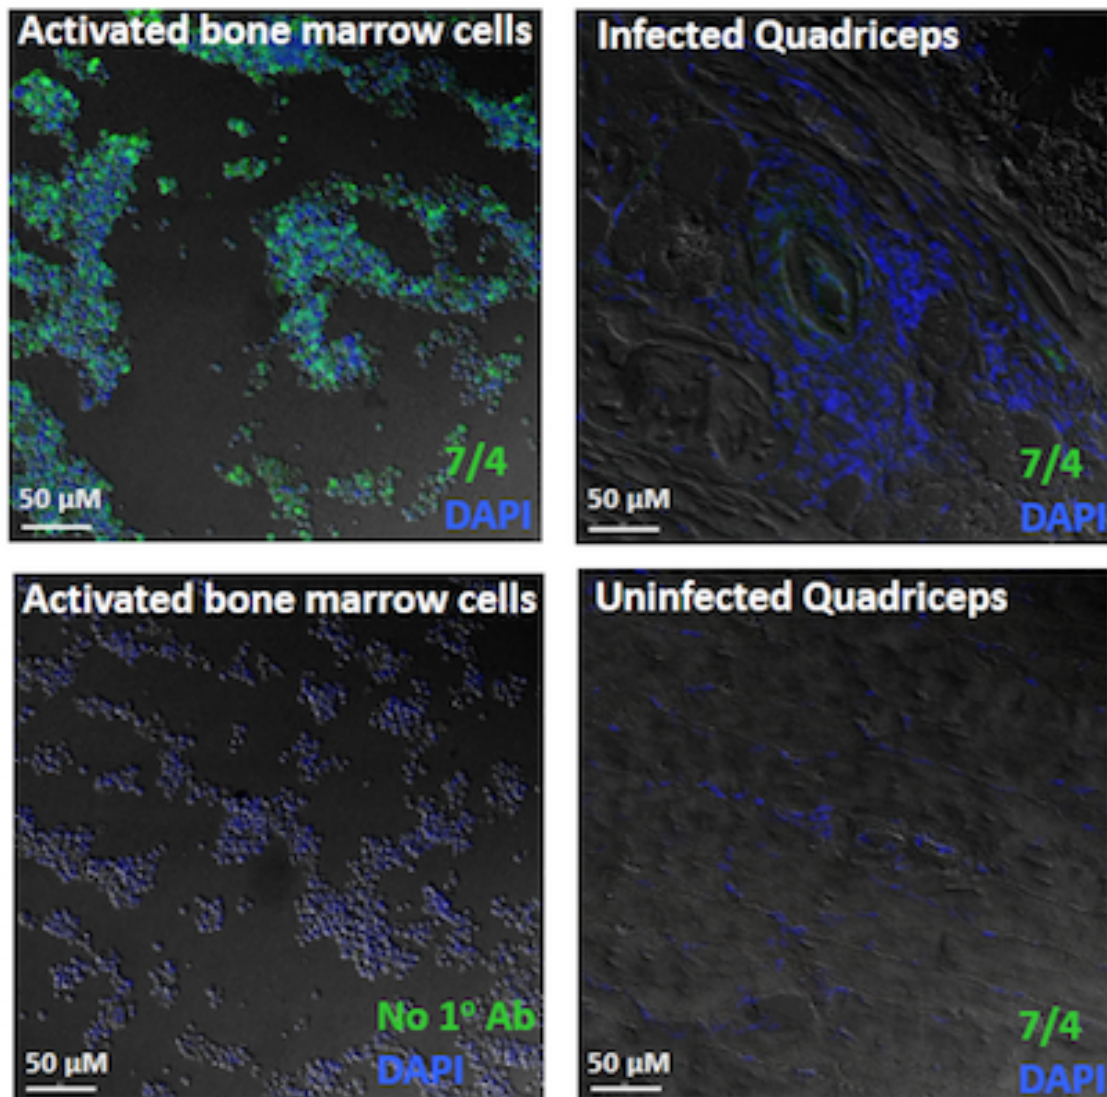

**Supplementary Figure 3. Analysis of neutrophils in systemic necrotizing vasculitis lesions.** Sections of quadriceps muscle from uninfected mice and chronically *T. cruzi*-infected mice were stained with mAb 7/4, and sections containing vasculitis lesions were imaged. Activated mouse bone marrow cells were stained with or without 7/4 as the primary antibody and with a secondary antibody to validate the specificity of the immunoreactivity. Magnification is indicated at the lower left of each panel.

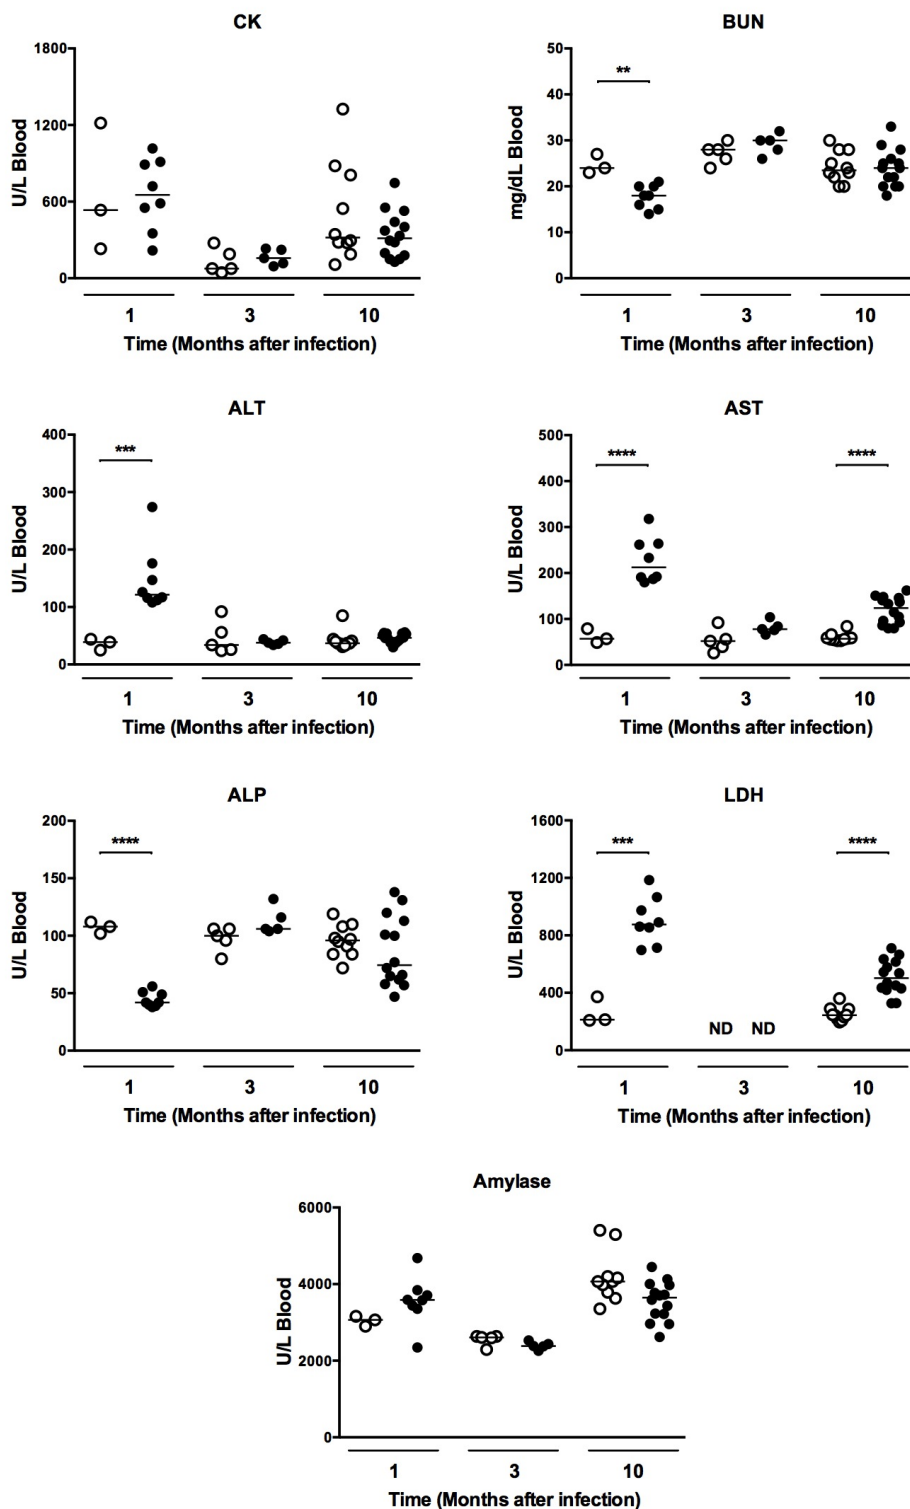

**Supplementary Figure 4. Serum biomarkers of organ function in chronically *T. cruzi*-infected mice.** Filled circles, infected mice; open circles, respective age-matched uninfected controls. Data for factors indicated at the top of each graph are expressed as individual values and the median. Data for the 1 and 3 month time points are from one experiment. Data for the 10-month time point are a pool of two independent experiments. \*\*,  $p = 0.007$ ; \*\*\* in ALT,  $p = 0.0007$ ; for LDH \*\*\*,  $p = 0.0001$  and \*\*\*\*,  $p, 0.0001$ .
